# Supplementary material
Source: Springer Nature journal article supplement (https://www.springermedizin.de/resource/supplementary/12955_2010_682_MOESM5_ESM.pdf/9561082)

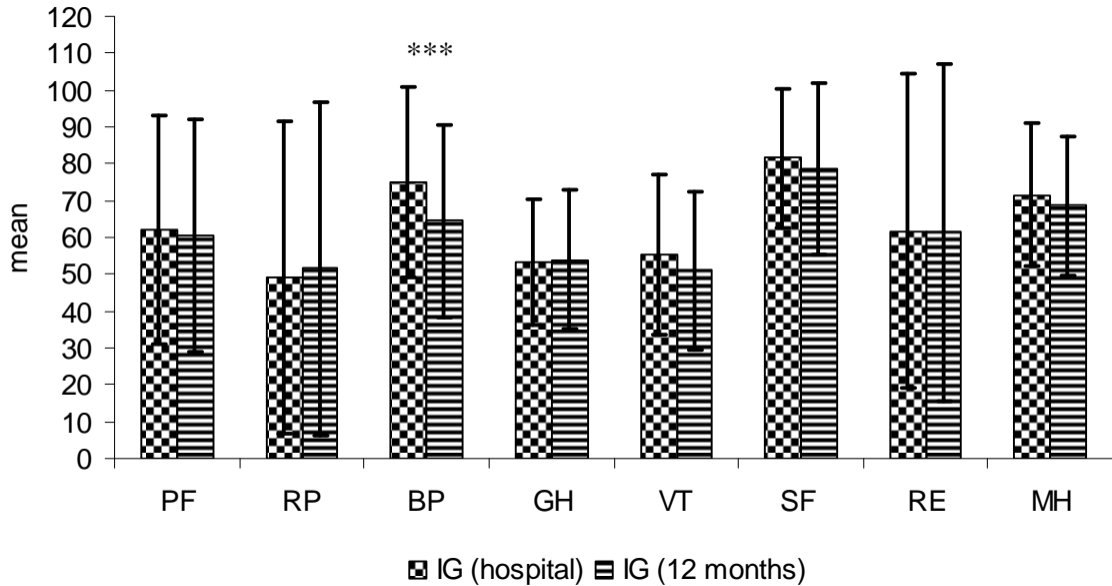

Supplement: MOESM5 [file 9561082]
